# Supplementary material
Source: PubMed Central journal article supplement (PMC7990595)
Supplement: 14-00869.pdf [file 14-00869.pdf]

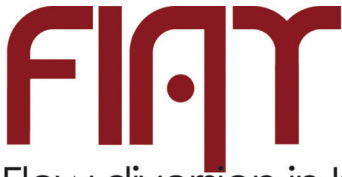

# Flow diversion in Intracranial Aneurysm Treatment

Name (can be anonymous if you prefer):

Date:

Select one or both, as appropriate:

- I treat aneurysms endovascularly
- I treat aneurysms surgically

How many years have you been treating aneurysms ?

- 0 year
- 1-5 years
- 6-10 years
- >10 years

How many patients have you treated with flow diversion?

- 0 patient
- 1-5 patients
- 6-15 patients
- >15 patients

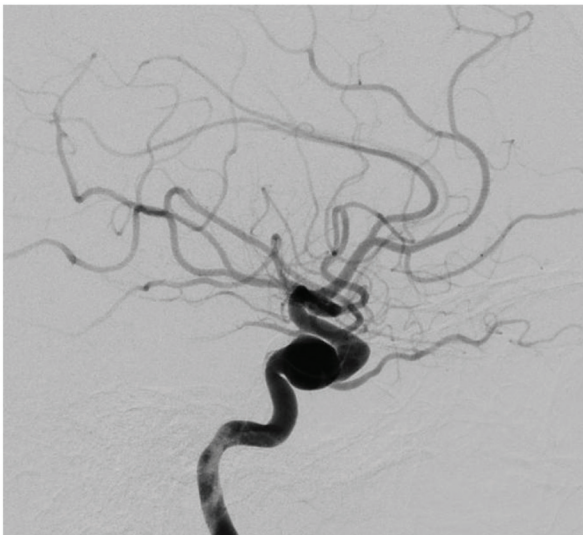

### Case 1

53 M

14 mm unruptured cavernous ICA aneurysm

Asymptomatic

Passed Test Balloon Occlusion

1. Is Flow diversion ( $\pm$  coils) an option for this patient ?

- Yes  No

2. Any other option that you would conceivably offer this patient ? Choose one :

- No, only FD  $\pm$  coils
- Coiling  $\pm$  stenting
- Parent vessel occlusion  $\pm$  bypass
- Surgical clipping
- Observation

3. Would you be willing to recruit *this* patient in an RCT that would give a 50% chance of FD and a 50% chance of Best Standard Treatment  Yes  No

4. Final best treatment choice:

- Flow diversion
- Coiling  $\pm$  stenting
- Parent vessel occlusion  $\pm$  bypass
- Surgical clipping
- Observation

5. Confidence level in your selection of final treatment choice:

- 
- 0%    20%    40%    60%    80%    100%

ON-LINE APPENDIX. FIAT survey.

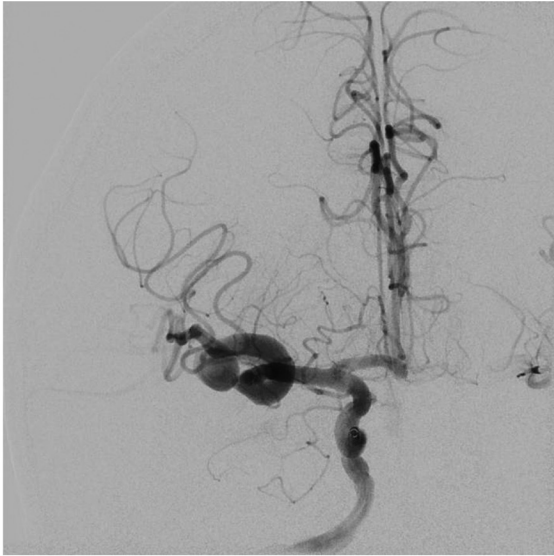

**Case 2**  
 47 M  
 22 mm unruptured MCA aneurysm  
 Seizures  
 Failed Test Balloon Occlusion

1. Is Flow diversion ( $\pm$  coils) an option for this patient ?  
 Yes  No
2. Any other option that you would conceivably offer this patient ? Choose one :  
 No, only FD  $\pm$  coils  
 Coiling  $\pm$  stenting  
 Parent vessel occlusion  $\pm$  bypass  
 Surgical clipping  
 Observation
3. Would you be willing to recruit *this* patient in an RCT that would give a 50% chance of FD and a 50% chance of Best Standard Treatment  Yes  No
4. Final best treatment choice:  
 Flow diversion  
 Coiling  $\pm$  stenting  
 Parent vessel occlusion  $\pm$  bypass  
 Surgical clipping  
 Observation
5. Confidence level in your selection of final treatment choice:  
            
 0% 20% 40% 60% 80% 100%

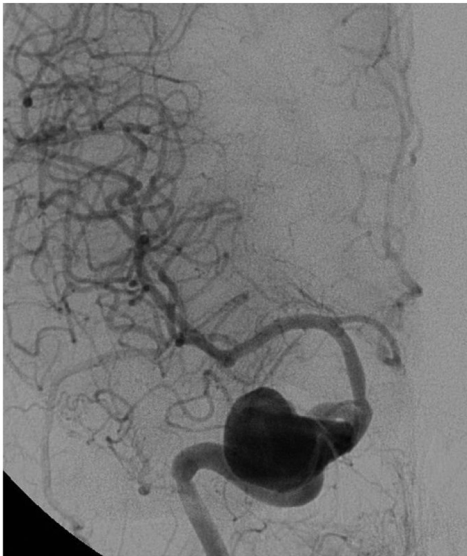

**Case 3**  
 53 M  
 43 mm unruptured cavernous ICA aneurysm  
 Ophthalmoplegia  
 Passed Test Balloon Occlusion

1. Is Flow diversion ( $\pm$  coils) an option for this patient ?  
 Yes  No
2. Any other option that you would conceivably offer this patient ? Choose one :  
 No, only FD  $\pm$  coils  
 Coiling  $\pm$  stenting  
 Parent vessel occlusion  $\pm$  bypass  
 Surgical clipping  
 Observation
3. Would you be willing to recruit *this* patient in an RCT that would give a 50% chance of FD and a 50% chance of Best Standard Treatment  Yes  No
4. Final best treatment choice:  
 Flow diversion  
 Coiling  $\pm$  stenting  
 Parent vessel occlusion  $\pm$  bypass  
 Surgical clipping  
 Observation
5. Confidence level in your selection of final treatment choice:  
            
 0% 20% 40% 60% 80% 100%

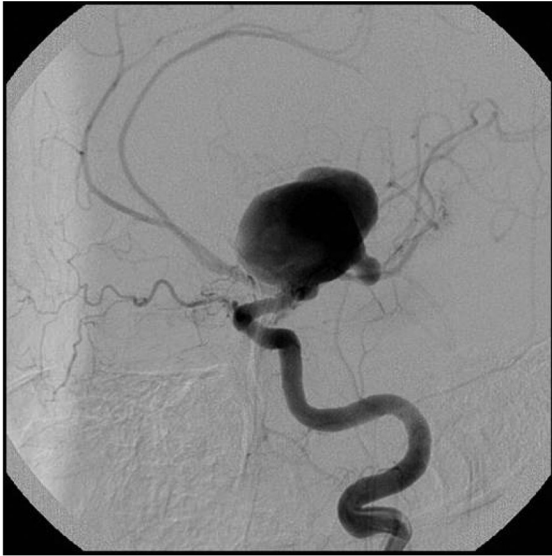

**Case 4**  
 54 M  
 34 mm unruptured MCA aneurysm  
 Non-disabling stroke  
 Failed Test Balloon Occlusion

1. Is Flow diversion ( $\pm$  coils) an option for this patient ?  
 Yes  No
2. Any other option that you would conceivably offer this patient ? Choose one :  
 No, only FD  $\pm$  coils  
 Coiling  $\pm$  stenting  
 Parent vessel occlusion  $\pm$  bypass  
 Surgical clipping  
 Observation
3. Would you be willing to recruit *this* patient in an RCT that would give a 50% chance of FD and a 50% chance of Best Standard Treatment  Yes  No
4. Final best treatment choice:  
 Flow diversion  
 Coiling  $\pm$  stenting  
 Parent vessel occlusion  $\pm$  bypass  
 Surgical clipping  
 Observation
5. Confidence level in your selection of final treatment choice:  
            
 0% 20% 40% 60% 80% 100%

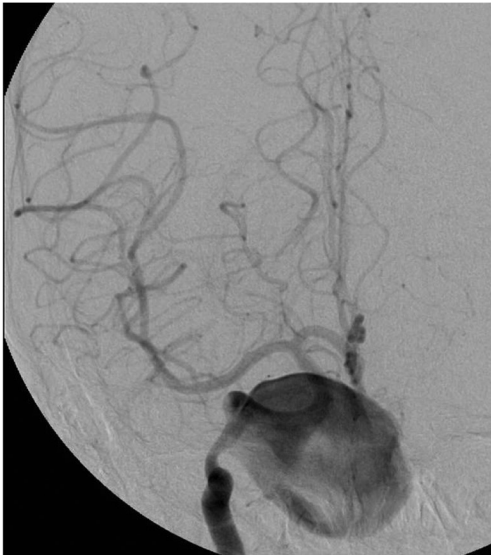

**Case 5**  
 53 M  
 55 mm unruptured cavernous ICA aneurysm  
 Atypical facial pain  
 Failed Test Balloon Occlusion

1. Is Flow diversion ( $\pm$  coils) an option for this patient ?  
 Yes  No
2. Any other option that you would conceivably offer this patient ? Choose one :  
 No, only FD  $\pm$  coils  
 Coiling  $\pm$  stenting  
 Parent vessel occlusion  $\pm$  bypass  
 Surgical clipping  
 Observation
3. Would you be willing to recruit *this* patient in an RCT that would give a 50% chance of FD and a 50% chance of Best Standard Treatment  Yes  No
4. Final best treatment choice:  
 Flow diversion  
 Coiling  $\pm$  stenting  
 Parent vessel occlusion  $\pm$  bypass  
 Surgical clipping  
 Observation
5. Confidence level in your selection of final treatment choice:  
            
 0% 20% 40% 60% 80% 100%



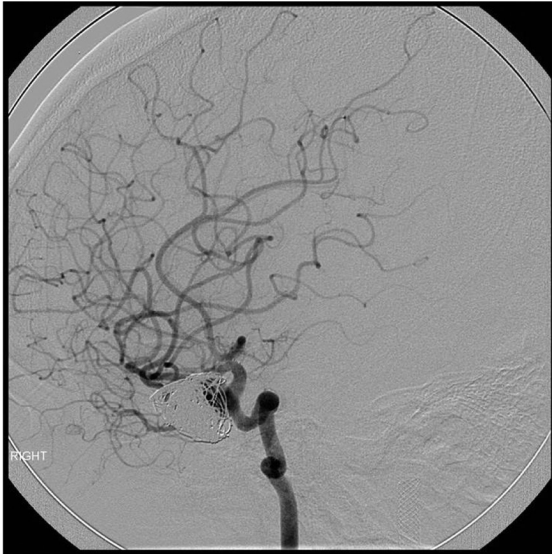

**Case 6**  
 37 F  
 Recurrent giant ophthalmic artery aneurysm  
 Passed Test Balloon Occlusion

1. Is Flow diversion ( $\pm$  coils) an option for this patient ?  
 Yes  No
2. Any other option that you would conceivably offer this patient ? Choose one :  
 No, only FD  $\pm$  coils  
 Coiling  $\pm$  stenting  
 Parent vessel occlusion  $\pm$  bypass  
 Surgical clipping  
 Observation
3. Would you be willing to recruit *this* patient in an RCT that would give a 50% chance of FD and a 50% chance of Best Standard Treatment  Yes  No
4. Final best treatment choice:  
 Flow diversion  
 Coiling  $\pm$  stenting  
 Parent vessel occlusion  $\pm$  bypass  
 Surgical clipping  
 Observation
5. Confidence level in your selection of final treatment choice:  
            
 0% 20% 40% 60% 80% 100%

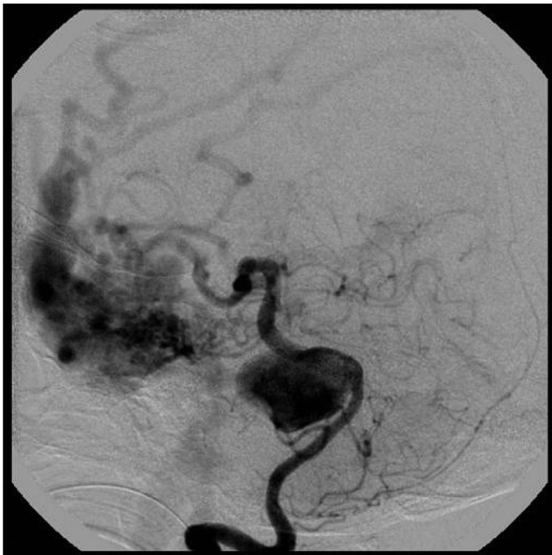

**Case 7**  
 55 F  
 29 mm vertebrobasilar junction aneurysm associated with AVM  
 Asymptomatic  
 Passed Test Balloon Occlusion

1. Is Flow diversion ( $\pm$  coils) an option for this patient ?  
 Yes  No
2. Any other option that you would conceivably offer this patient ? Choose one :  
 No, only FD  $\pm$  coils  
 Coiling  $\pm$  stenting  
 Parent vessel occlusion  $\pm$  bypass  
 Surgical clipping  
 Observation
3. Would you be willing to recruit *this* patient in an RCT that would give a 50% chance of FD and a 50% chance of Best Standard Treatment  Yes  No
4. Final best treatment choice:  
 Flow diversion  
 Coiling  $\pm$  stenting  
 Parent vessel occlusion  $\pm$  bypass  
 Surgical clipping  
 Observation
5. Confidence level in your selection of final treatment choice:  
            
 0% 20% 40% 60% 80% 100%



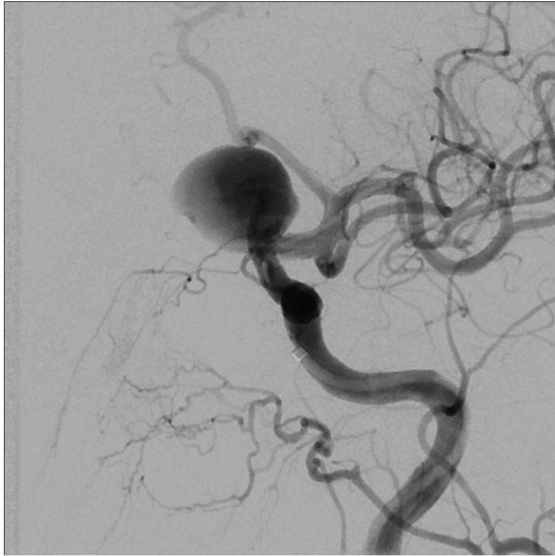

**Case 8**

57 F  
 22 mm unruptured ophthalmic artery aneurysm  
 Visual loss  
 Failed Test Balloon Occlusion

1. Is Flow diversion ( $\pm$  coils) an option for this patient ?  
 Yes  No
2. Any other option that you would conceivably offer this patient ? Choose one :  
 No, only FD  $\pm$  coils  
 Coiling  $\pm$  stenting  
 Parent vessel occlusion  $\pm$  bypass  
 Surgical clipping  
 Observation
3. Would you be willing to recruit *this* patient in an RCT that would give a 50% chance of FD and a 50% chance of Best Standard Treatment  Yes  No
4. Final best treatment choice:  
 Flow diversion  
 Coiling  $\pm$  stenting  
 Parent vessel occlusion  $\pm$  bypass  
 Surgical clipping  
 Observation
5. Confidence level in your selection of final treatment choice:  
            
 0% 20% 40% 60% 80% 100%

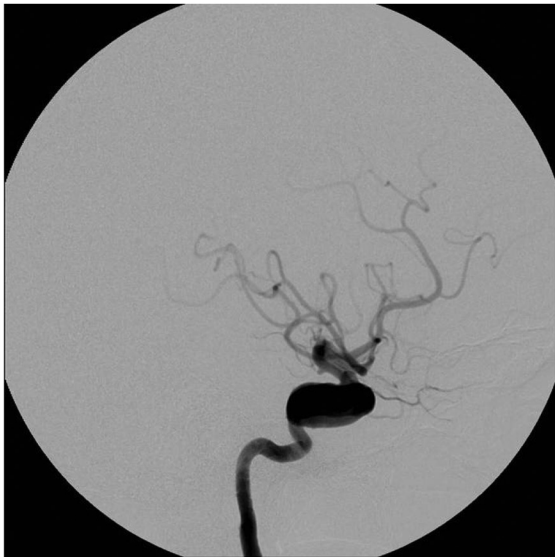

**Case 9**

84 M  
 30 mm unruptured cavernous ICA aneurysm  
 Ophthalmoplegia  
 Failed Test Balloon Occlusion

1. Is Flow diversion ( $\pm$  coils) an option for this patient ?  
 Yes  No
2. Any other option that you would conceivably offer this patient ? Choose one :  
 No, only FD  $\pm$  coils  
 Coiling  $\pm$  stenting  
 Parent vessel occlusion  $\pm$  bypass  
 Surgical clipping  
 Observation
3. Would you be willing to recruit *this* patient in an RCT that would give a 50% chance of FD and a 50% chance of Best Standard Treatment  Yes  No
4. Final best treatment choice:  
 Flow diversion  
 Coiling  $\pm$  stenting  
 Parent vessel occlusion  $\pm$  bypass  
 Surgical clipping  
 Observation
5. Confidence level in your selection of final treatment choice:  
            
 0% 20% 40% 60% 80% 100%

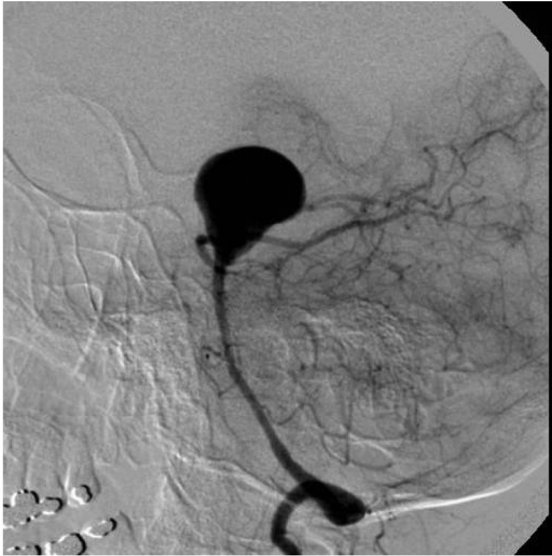

**Case 10**

67 F

38 mm unruptured basilar tip aneurysm

Headaches

Failed Test Balloon Occlusion

1. Is Flow diversion ( $\pm$  coils) an option for this patient ?

Yes  No

2. Any other option that you would conceivably offer this patient ? Choose one :

- No, only FD  $\pm$  coils
- Coiling  $\pm$  stenting
- Parent vessel occlusion  $\pm$  bypass
- Surgical clipping
- Observation

3. Would you be willing to recruit *this* patient in an RCT that would give a 50% chance of FD and a 50% chance of Best Standard Treatment  Yes  No

4. Final best treatment choice:

- Flow diversion
- Coiling  $\pm$  stenting
- Parent vessel occlusion  $\pm$  bypass
- Surgical clipping
- Observation

5. Confidence level in your selection of final treatment choice:

0% 20% 40% 60% 80% 100%

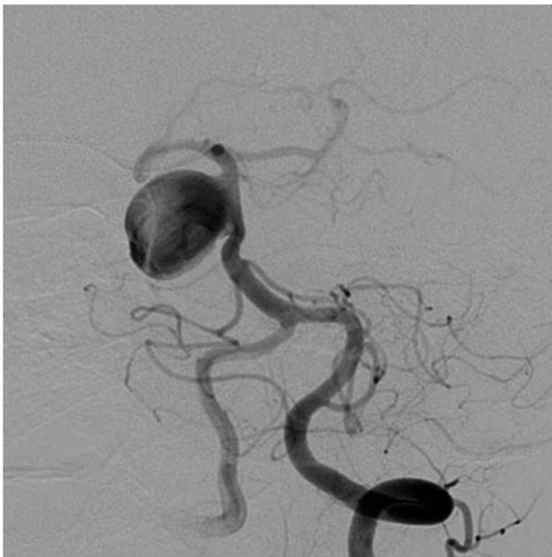

**Case 11**

51 F

38 mm unruptured basilar trunk aneurysm

No mass effect

Failed Test Balloon Occlusion

1. Is Flow diversion ( $\pm$  coils) an option for this patient ?

Yes  No

2. Any other option that you would conceivably offer this patient ? Choose one :

- No, only FD  $\pm$  coils
- Coiling  $\pm$  stenting
- Parent vessel occlusion  $\pm$  bypass
- Surgical clipping
- Observation

3. Would you be willing to recruit *this* patient in an RCT that would give a 50% chance of FD and a 50% chance of Best Standard Treatment  Yes  No

4. Final best treatment choice:

- Flow diversion
- Coiling  $\pm$  stenting
- Parent vessel occlusion  $\pm$  bypass
- Surgical clipping
- Observation

5. Confidence level in your selection of final treatment choice:

0% 20% 40% 60% 80% 100%

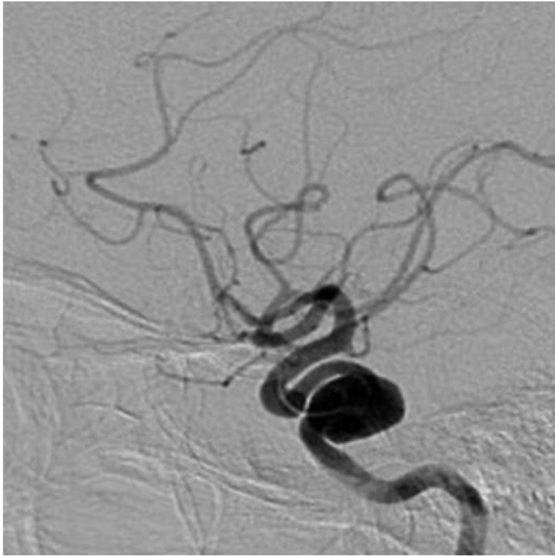

**Case 12**

83 F

28 mm unruptured cavernous ICA aneurysm

Mild ophthalmoplegia

Failed Test Balloon Occlusion

1. Is Flow diversion ( $\pm$  coils) an option for this patient ?

Yes  No

2. Any other option that you would conceivably offer this patient ? Choose one :

- No, only FD  $\pm$  coils
- Coiling  $\pm$  stenting
- Parent vessel occlusion  $\pm$  bypass
- Surgical clipping
- Observation

3. Would you be willing to recruit *this* patient in an RCT that would give a 50% chance of FD and a 50% chance of Best Standard Treatment  Yes  No

4. Final best treatment choice:

- Flow diversion
- Coiling  $\pm$  stenting
- Parent vessel occlusion  $\pm$  bypass
- Surgical clipping
- Observation

5. Confidence level in your selection of final treatment choice:

0% 20% 40% 60% 80% 100%

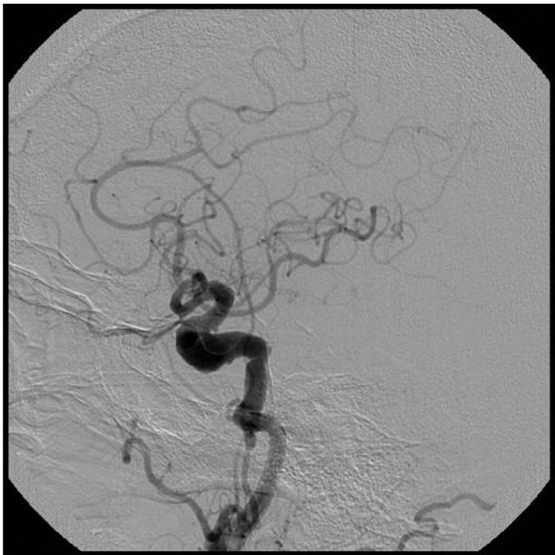

**Case 13**

64 M

40 mm cavernous carotid ICA aneurysm

Ophthalmoplegia

Passed Test Balloon Occlusion

1. Is Flow diversion ( $\pm$  coils) an option for this patient ?

Yes  No

2. Any other option that you would conceivably offer this patient ? Choose one :

- No, only FD  $\pm$  coils
- Coiling  $\pm$  stenting
- Parent vessel occlusion  $\pm$  bypass
- Surgical clipping
- Observation

3. Would you be willing to recruit *this* patient in an RCT that would give a 50% chance of FD and a 50% chance of Best Standard Treatment  Yes  No

4. Final best treatment choice:

- Flow diversion
- Coiling  $\pm$  stenting
- Parent vessel occlusion  $\pm$  bypass
- Surgical clipping
- Observation

5. Confidence level in your selection of final treatment choice:

0% 20% 40% 60% 80% 100%



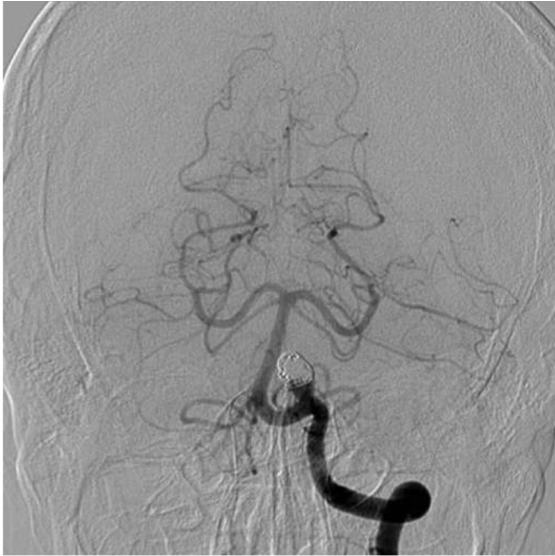

**Case 14**  
 47 F  
 Recurrent previously coiled PICA aneurysm  
 Asymptomatic  
 Failed Test Balloon Occlusion

1. Is Flow diversion ( $\pm$  coils) an option for this patient ?  
 Yes  No
2. Any other option that you would conceivably offer this patient ? Choose one :  
 No, only FD  $\pm$  coils  
 Coiling  $\pm$  stenting  
 Parent vessel occlusion  $\pm$  bypass  
 Surgical clipping  
 Observation
3. Would you be willing to recruit *this* patient in an RCT that would give a 50% chance of FD and a 50% chance of Best Standard Treatment  Yes  No
4. Final best treatment choice:  
 Flow diversion  
 Coiling  $\pm$  stenting  
 Parent vessel occlusion  $\pm$  bypass  
 Surgical clipping  
 Observation
5. Confidence level in your selection of final treatment choice:  
            
 0% 20% 40% 60% 80% 100%

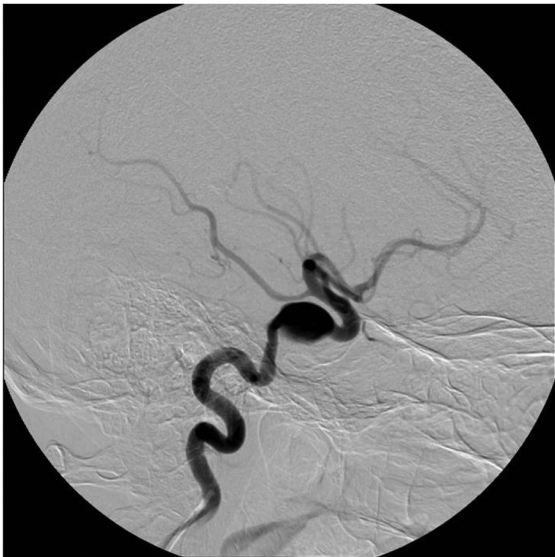

**Case 15**  
 79 F  
 Asymptomatic 16 mm cavernous aneurysm  
 Failed Test Balloon Occlusion

1. Is Flow diversion ( $\pm$  coils) an option for this patient ?  
 Yes  No
2. Any other option that you would conceivably offer this patient ? Choose one :  
 No, only FD  $\pm$  coils  
 Coiling  $\pm$  stenting  
 Parent vessel occlusion  $\pm$  bypass  
 Surgical clipping  
 Observation
3. Would you be willing to recruit *this* patient in an RCT that would give a 50% chance of FD and a 50% chance of Best Standard Treatment  Yes  No
4. Final best treatment choice:  
 Flow diversion  
 Coiling  $\pm$  stenting  
 Parent vessel occlusion  $\pm$  bypass  
 Surgical clipping  
 Observation
5. Confidence level in your selection of final treatment choice:  
            
 0% 20% 40% 60% 80% 100%

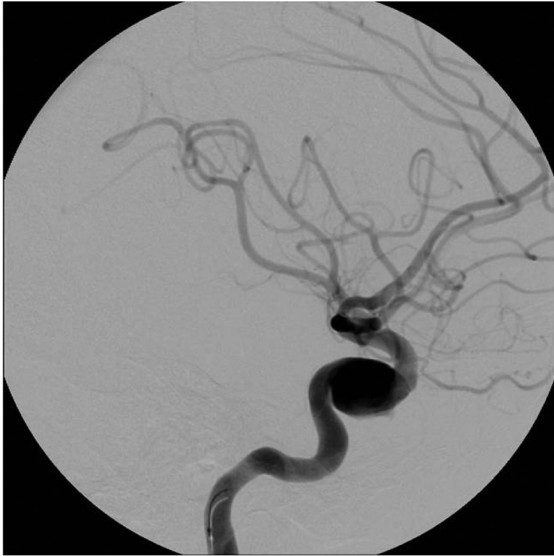

**Case 16**

56 M

22 mm symptomatic cavernous aneurysm

Passed Test Balloon Occlusion

1. Is Flow diversion ( $\pm$  coils) an option for this patient ?

Yes  No

2. Any other option that you would conceivably offer this patient ? Choose one :

- No, only FD  $\pm$  coils
- Coiling  $\pm$  stenting
- Parent vessel occlusion  $\pm$  bypass
- Surgical clipping
- Observation

3. Would you be willing to recruit *this* patient in an RCT that would give a 50% chance of FD and a 50% chance of Best Standard Treatment  Yes  No

4. Final best treatment choice:

- Flow diversion
- Coiling  $\pm$  stenting
- Parent vessel occlusion  $\pm$  bypass
- Surgical clipping
- Observation

5. Confidence level in your selection of final treatment choice:

0% 20% 40% 60% 80% 100%

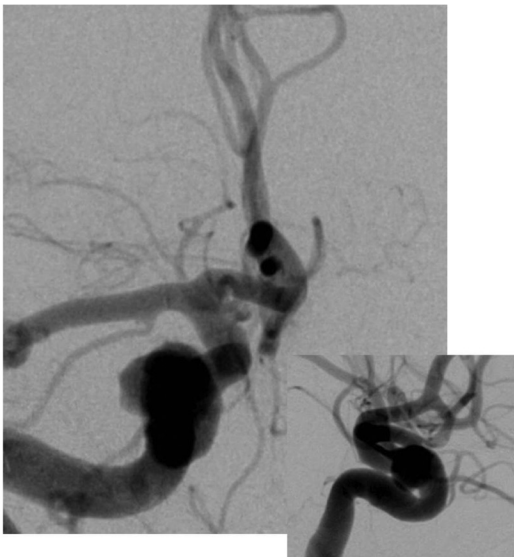

**Case 17**

62 F

11 mm ophthalmic artery aneurysm

Headaches

Passed Test Balloon Occlusion

1. Is Flow diversion ( $\pm$  coils) an option for this patient ?

Yes  No

2. Any other option that you would conceivably offer this patient ? Choose one :

- No, only FD  $\pm$  coils
- Coiling  $\pm$  stenting
- Parent vessel occlusion  $\pm$  bypass
- Surgical clipping
- Observation

3. Would you be willing to recruit *this* patient in an RCT that would give a 50% chance of FD and a 50% chance of Best Standard Treatment  Yes  No

4. Final best treatment choice:

- Flow diversion
- Coiling  $\pm$  stenting
- Parent vessel occlusion  $\pm$  bypass
- Surgical clipping
- Observation

5. Confidence level in your selection of final treatment choice:

0% 20% 40% 60% 80% 100%

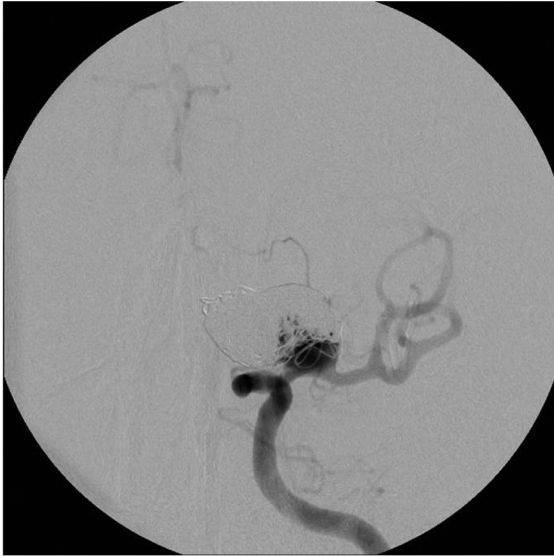

**Case 18**  
 38 F  
 Recurrent previously coiled carotid terminus aneurysm  
 Asymptomatic

1. Is Flow diversion ( $\pm$  coils) an option for this patient ?  
 Yes    No
2. Any other option that you would conceivably offer this patient ? Choose one :  
 No, only FD  $\pm$  coils  
 Coiling  $\pm$  stenting  
 Parent vessel occlusion  $\pm$  bypass  
 Surgical clipping  
 Observation
3. Would you be willing to recruit *this* patient in an RCT that would give a 50% chance of FD and a 50% chance of Best Standard Treatment  Yes    No
4. Final best treatment choice:  
 Flow diversion  
 Coiling  $\pm$  stenting  
 Parent vessel occlusion  $\pm$  bypass  
 Surgical clipping  
 Observation
5. Confidence level in your selection of final treatment choice:  
            
 0%   20%   40%   60%   80%   100%

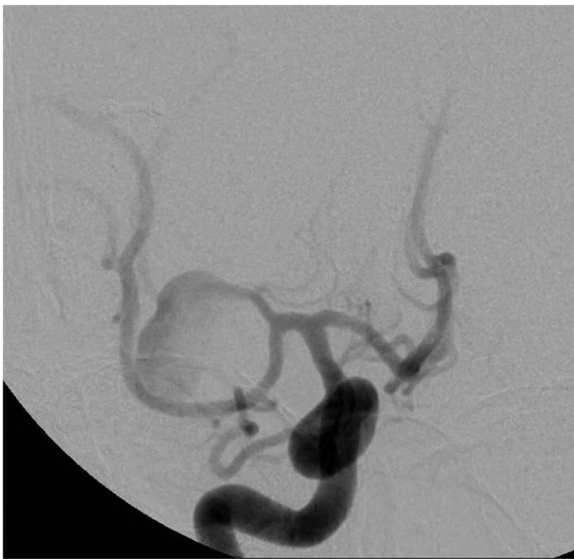

**Case 19**  
 51 M  
 Partially thrombosed 20 mm MCA aneurysm  
 Seizures

1. Is Flow diversion ( $\pm$  coils) an option for this patient ?  
 Yes    No
2. Any other option that you would conceivably offer this patient ? Choose one :  
 No, only FD  $\pm$  coils  
 Coiling  $\pm$  stenting  
 Parent vessel occlusion  $\pm$  bypass  
 Surgical clipping  
 Observation
3. Would you be willing to recruit *this* patient in an RCT that would give a 50% chance of FD and a 50% chance of Best Standard Treatment  Yes    No
4. Final best treatment choice:  
 Flow diversion  
 Coiling  $\pm$  stenting  
 Parent vessel occlusion  $\pm$  bypass  
 Surgical clipping  
 Observation
5. Confidence level in your selection of final treatment choice:  
            
 0%   20%   40%   60%   80%   100%



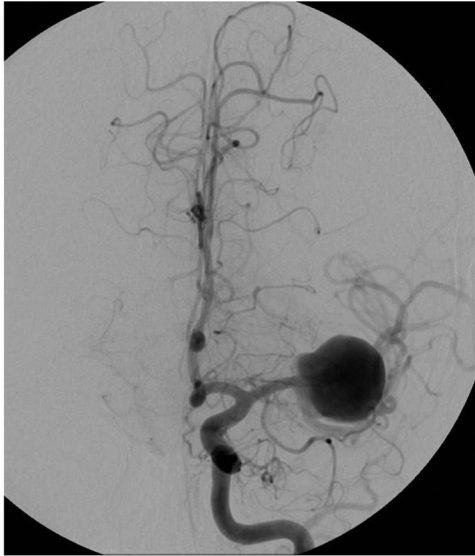

**Case 20**  
 56 F  
 20 mm MCA aneurysm  
 Screening for positive family history

1. Is Flow diversion ( $\pm$  coils) an option for this patient ?  
 Yes  No
2. Any other option that you would conceivably offer this patient ? Choose one :  
 No, only FD  $\pm$  coils  
 Coiling  $\pm$  stenting  
 Parent vessel occlusion  $\pm$  bypass  
 Surgical clipping  
 Observation
3. Would you be willing to recruit *this* patient in an RCT that would give a 50% chance of FD and a 50% chance of Best Standard Treatment  Yes  No
4. Final best treatment choice:  
 Flow diversion  
 Coiling  $\pm$  stenting  
 Parent vessel occlusion  $\pm$  bypass  
 Surgical clipping  
 Observation
5. Confidence level in your selection of final treatment choice:  
            
 0% 20% 40% 60% 80% 100%

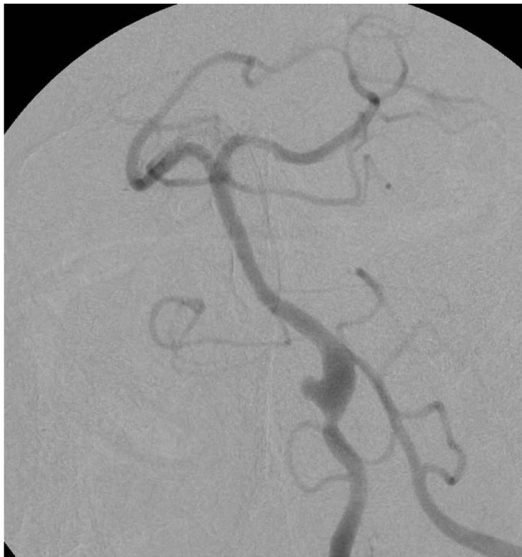

**Case 21**  
 67 M  
 Dissecting right vertebral artery aneurysm  
 Grade III SAH

1. Is Flow diversion ( $\pm$  coils) an option for this patient ?  
 Yes  No
2. Any other option that you would conceivably offer this patient ? Choose one :  
 No, only FD  $\pm$  coils  
 Coiling  $\pm$  stenting  
 Parent vessel occlusion  $\pm$  bypass  
 Surgical clipping  
 Observation
3. Would you be willing to recruit *this* patient in an RCT that would give a 50% chance of FD and a 50% chance of Best Standard Treatment  Yes  No
4. Final best treatment choice:  
 Flow diversion  
 Coiling  $\pm$  stenting  
 Parent vessel occlusion  $\pm$  bypass  
 Surgical clipping  
 Observation
5. Confidence level in your selection of final treatment choice:  
            
 0% 20% 40% 60% 80% 100%

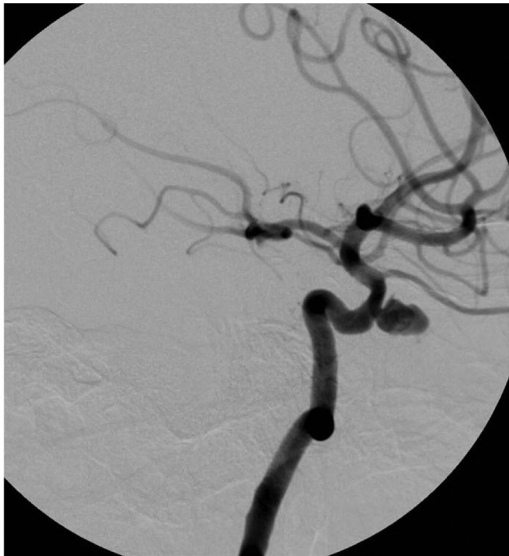

**Case 22**  
 54 F  
 Partially thrombosed 22 mm cavernous aneurysm  
 Ophthalmoplegia  
 Passed Test Balloon Occlusion

1. Is Flow diversion ( $\pm$  coils) an option for this patient ?  
 Yes  No
2. Any other option that you would conceivably offer this patient ? Choose one :  
 No, only FD  $\pm$  coils  
 Coiling  $\pm$  stenting  
 Parent vessel occlusion  $\pm$  bypass  
 Surgical clipping  
 Observation
3. Would you be willing to recruit *this* patient in an RCT that would give a 50% chance of FD and a 50% chance of Best Standard Treatment  Yes  No
4. Final best treatment choice:  
 Flow diversion  
 Coiling  $\pm$  stenting  
 Parent vessel occlusion  $\pm$  bypass  
 Surgical clipping  
 Observation
5. Confidence level in your selection of final treatment choice:  
            
 0% 20% 40% 60% 80% 100%

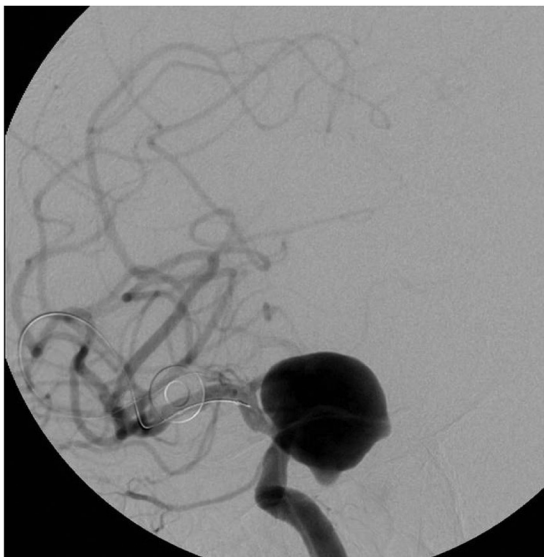

**Case 23**  
 42 F  
 22 mm ophthalmic artery aneurysm  
 Ophthalmoplegia  
 Failed Test Balloon Occlusion

1. Is Flow diversion ( $\pm$  coils) an option for this patient ?  
 Yes  No
2. Any other option that you would conceivably offer this patient ? Choose one :  
 No, only FD  $\pm$  coils  
 Coiling  $\pm$  stenting  
 Parent vessel occlusion  $\pm$  bypass  
 Surgical clipping  
 Observation
3. Would you be willing to recruit *this* patient in an RCT that would give a 50% chance of FD and a 50% chance of Best Standard Treatment  Yes  No
4. Final best treatment choice:  
 Flow diversion  
 Coiling  $\pm$  stenting  
 Parent vessel occlusion  $\pm$  bypass  
 Surgical clipping  
 Observation
5. Confidence level in your selection of final treatment choice:  
            
 0% 20% 40% 60% 80% 100%

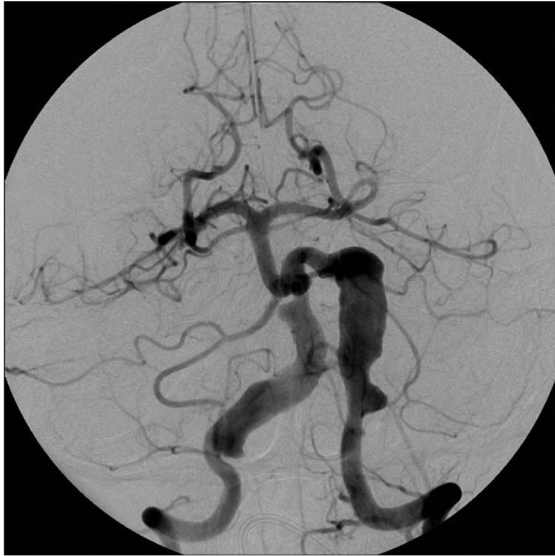

**Case 24**  
 17 M  
 Bilateral 32 mm fusiform aneurysms of vertebrobasilar junction  
 Asymptomatic  
 Failed bilateral vert. Test Balloon Occlusion

1. Is Flow diversion ( $\pm$  coils) an option for this patient ?  
 Yes  No
2. Any other option that you would conceivably offer this patient ? Choose one :  
 No, only FD  $\pm$  coils  
 Coiling  $\pm$  stenting  
 Parent vessel occlusion  $\pm$  bypass  
 Surgical clipping  
 Observation
3. Would you be willing to recruit *this* patient in an RCT that would give a 50% chance of FD and a 50% chance of Best Standard Treatment  Yes  No
4. Final best treatment choice:  
 Flow diversion  
 Coiling  $\pm$  stenting  
 Parent vessel occlusion  $\pm$  bypass  
 Surgical clipping  
 Observation
5. Confidence level in your selection of final treatment choice:  
            
 0% 20% 40% 60% 80% 100%

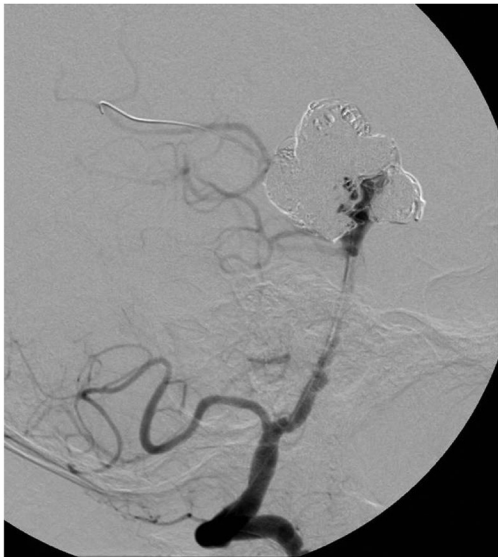

**Case 25**  
 46 F  
 Recurrent previously coiled basilar tip aneurysm  
 Asymptomatic  
 Failed Test Balloon Occlusion

1. Is Flow diversion ( $\pm$  coils) an option for this patient ?  
 Yes  No
2. Any other option that you would conceivably offer this patient ? Choose one :  
 No, only FD  $\pm$  coils  
 Coiling  $\pm$  stenting  
 Parent vessel occlusion  $\pm$  bypass  
 Surgical clipping  
 Observation
3. Would you be willing to recruit *this* patient in an RCT that would give a 50% chance of FD and a 50% chance of Best Standard Treatment  Yes  No
4. Final best treatment choice:  
 Flow diversion  
 Coiling  $\pm$  stenting  
 Parent vessel occlusion  $\pm$  bypass  
 Surgical clipping  
 Observation
5. Confidence level in your selection of final treatment choice:  
            
 0% 20% 40% 60% 80% 100%



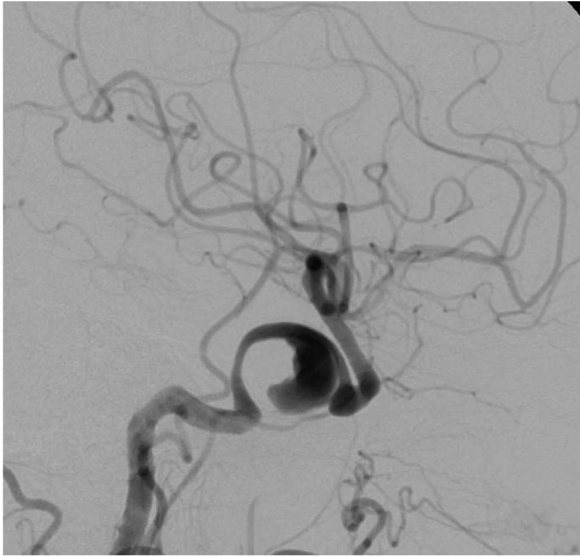

**Case 26**  
 62 F  
 Partially thrombosed 25 mm cavernous aneurysm  
 Minor stroke  
 Failed Test Balloon Occlusion

1. Is Flow diversion ( $\pm$  coils) an option for this patient ?  
 Yes  No
2. Any other option that you would conceivably offer this patient ? Choose one :  
 No, only FD  $\pm$  coils  
 Coiling  $\pm$  stenting  
 Parent vessel occlusion  $\pm$  bypass  
 Surgical clipping  
 Observation
3. Would you be willing to recruit *this* patient in an RCT that would give a 50% chance of FD and a 50% chance of Best Standard Treatment  Yes  No
4. Final best treatment choice:  
 Flow diversion  
 Coiling  $\pm$  stenting  
 Parent vessel occlusion  $\pm$  bypass  
 Surgical clipping  
 Observation
5. Confidence level in your selection of final treatment choice:  
            
 0% 20% 40% 60% 80% 100%

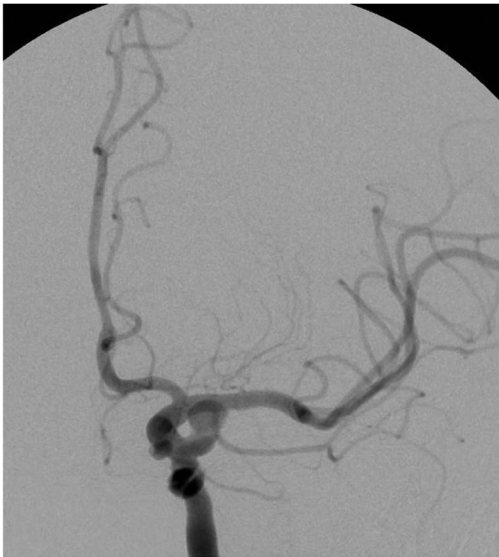

**Case 27**  
 27 F  
 Multiple clinoid and supraclinoid aneurysms (largest 7 mm)  
 Asymptomatic  
 Passed Test Balloon Occlusion

1. Is Flow diversion ( $\pm$  coils) an option for this patient ?  
 Yes  No
2. Any other option that you would conceivably offer this patient ? Choose one :  
 No, only FD  $\pm$  coils  
 Coiling  $\pm$  stenting  
 Parent vessel occlusion  $\pm$  bypass  
 Surgical clipping  
 Observation
3. Would you be willing to recruit *this* patient in an RCT that would give a 50% chance of FD and a 50% chance of Best Standard Treatment  Yes  No
4. Final best treatment choice:  
 Flow diversion  
 Coiling  $\pm$  stenting  
 Parent vessel occlusion  $\pm$  bypass  
 Surgical clipping  
 Observation
5. Confidence level in your selection of final treatment choice:  
            
 0% 20% 40% 60% 80% 100%

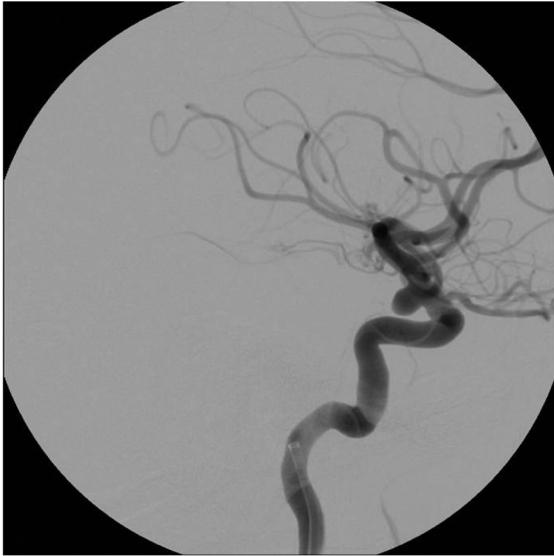

**Case 28**  
29 F  
Wide-neck 5 mm carotid aneurysm  
Asymptomatic

1. Is Flow diversion ( $\pm$  coils) an option for this patient ?  
 Yes  No
2. Any other option that you would conceivably offer this patient ? Choose one :  
 No, only FD  $\pm$  coils  
 Coiling  $\pm$  stenting  
 Parent vessel occlusion  $\pm$  bypass  
 Surgical clipping  
 Observation
3. Would you be willing to recruit *this* patient in an RCT that would give a 50% chance of FD and a 50% chance of Best Standard Treatment  Yes  No
4. Final best treatment choice:  
 Flow diversion  
 Coiling  $\pm$  stenting  
 Parent vessel occlusion  $\pm$  bypass  
 Surgical clipping  
 Observation
5. Confidence level in your selection of final treatment choice:  
            
0%    20%    40%    60%    80%    100%

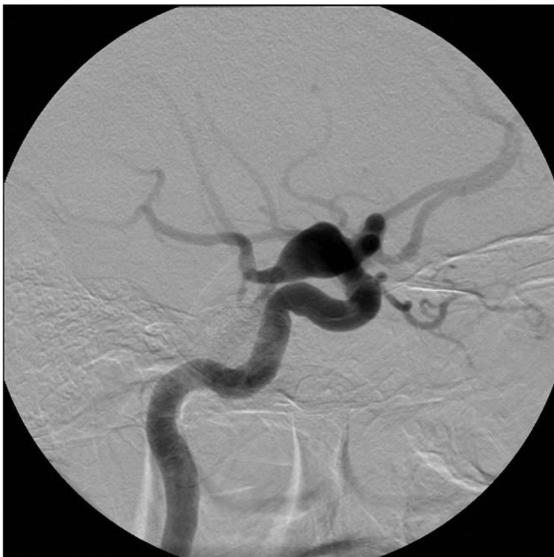

**Case 29**  
73 F  
16 mm dysplastic PCoM aneurysm  
Grade I SAH

1. Is Flow diversion ( $\pm$  coils) an option for this patient ?  
 Yes  No
2. Any other option that you would conceivably offer this patient ? Choose one :  
 No, only FD  $\pm$  coils  
 Coiling  $\pm$  stenting  
 Parent vessel occlusion  $\pm$  bypass  
 Surgical clipping  
 Observation
3. Would you be willing to recruit *this* patient in an RCT that would give a 50% chance of FD and a 50% chance of Best Standard Treatment  Yes  No
4. Final best treatment choice:  
 Flow diversion  
 Coiling  $\pm$  stenting  
 Parent vessel occlusion  $\pm$  bypass  
 Surgical clipping  
 Observation
5. Confidence level in your selection of final treatment choice:  
            
0%    20%    40%    60%    80%    100%

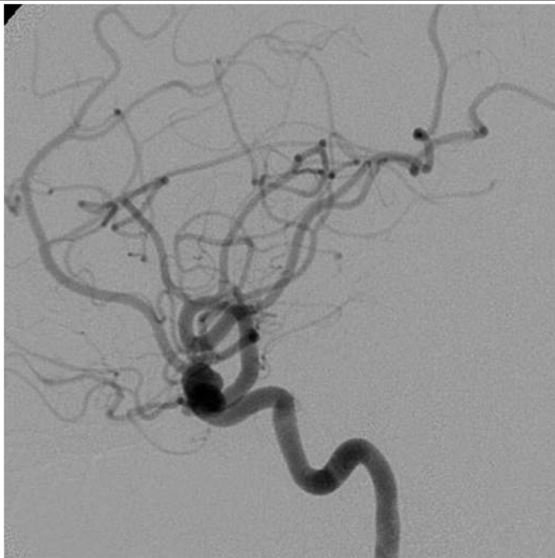

**Case 30**  
 43 F  
 9 mm ophthalmic aneurysm  
 Asymptomatic  
 Failed Test Balloon Occlusion

1. Is Flow diversion ( $\pm$  coils) an option for this patient ?  
 Yes  No
2. Any other option that you would conceivably offer this patient ? Choose one :  
 No, only FD  $\pm$  coils  
 Coiling  $\pm$  stenting  
 Parent vessel occlusion  $\pm$  bypass  
 Surgical clipping  
 Observation
3. Would you be willing to recruit *this* patient in an RCT that would give a 50% chance of FD and a 50% chance of Best Standard Treatment  Yes  No
4. Final best treatment choice:  
 Flow diversion  
 Coiling  $\pm$  stenting  
 Parent vessel occlusion  $\pm$  bypass  
 Surgical clipping  
 Observation
5. Confidence level in your selection of final treatment choice:  
            
 0%    20%    40%    60%    80%    100%

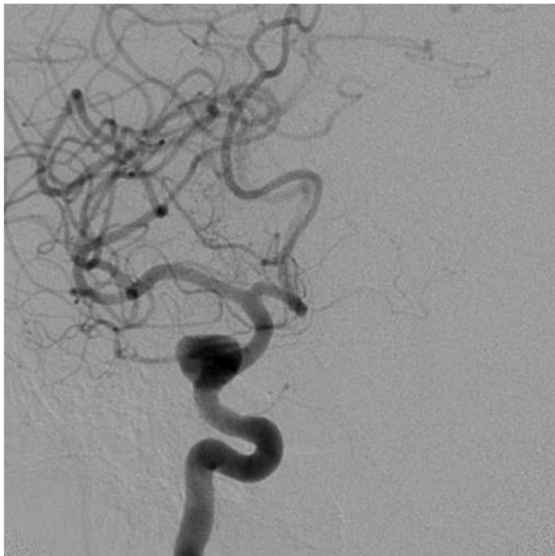

**Case 31**  
 39 F  
 10 mm ophthalmic artery aneurysm  
 Visual changes  
 Failed Test Balloon Occlusion

1. Is Flow diversion ( $\pm$  coils) an option for this patient ?  
 Yes  No
2. Any other option that you would conceivably offer this patient ? Choose one :  
 No, only FD  $\pm$  coils  
 Coiling  $\pm$  stenting  
 Parent vessel occlusion  $\pm$  bypass  
 Surgical clipping  
 Observation
3. Would you be willing to recruit *this* patient in an RCT that would give a 50% chance of FD and a 50% chance of Best Standard Treatment  Yes  No
4. Final best treatment choice:  
 Flow diversion  
 Coiling  $\pm$  stenting  
 Parent vessel occlusion  $\pm$  bypass  
 Surgical clipping  
 Observation
5. Confidence level in your selection of final treatment choice:  
            
 0%    20%    40%    60%    80%    100%

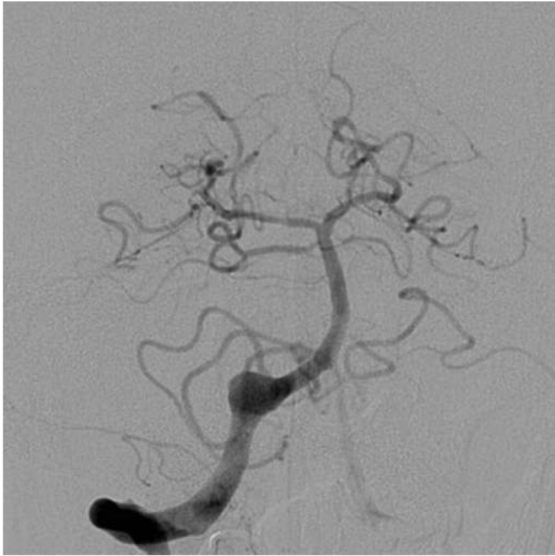

**Case 32**

49 M  
 12 mm vertebral artery aneurysm  
 Asymptomatic  
 Passed Test Balloon Occlusion

1. Is Flow diversion ( $\pm$  coils) an option for this patient ?  
 Yes  No
2. Any other option that you would conceivably offer this patient ? Choose one :  
 No, only FD  $\pm$  coils  
 Coiling  $\pm$  stenting  
 Parent vessel occlusion  $\pm$  bypass  
 Surgical clipping  
 Observation
3. Would you be willing to recruit *this* patient in an RCT that would give a 50% chance of FD and a 50% chance of Best Standard Treatment  Yes  No
4. Final best treatment choice:  
 Flow diversion  
 Coiling  $\pm$  stenting  
 Parent vessel occlusion  $\pm$  bypass  
 Surgical clipping  
 Observation
5. Confidence level in your selection of final treatment choice:  
            
 0%    20%    40%    60%    80%    100%

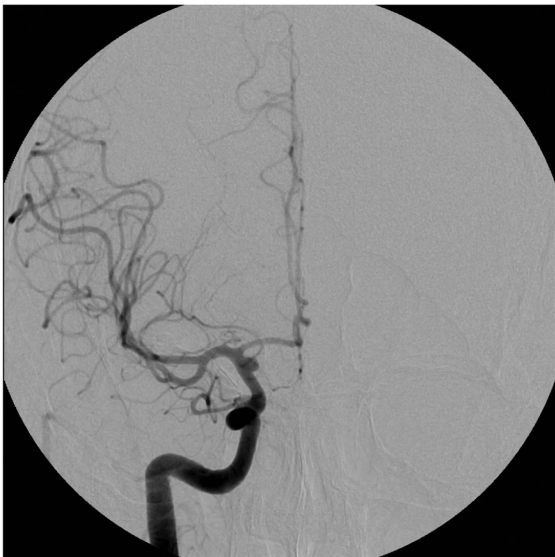

**Case 33**

45 M  
 Supraclinoid carotid blister aneurysm  
 Grade I SAH

1. Is Flow diversion ( $\pm$  coils) an option for this patient ?  
 Yes  No
2. Any other option that you would conceivably offer this patient ? Choose one :  
 No, only FD  $\pm$  coils  
 Coiling  $\pm$  stenting  
 Parent vessel occlusion  $\pm$  bypass  
 Surgical clipping  
 Observation
3. Would you be willing to recruit *this* patient in an RCT that would give a 50% chance of FD and a 50% chance of Best Standard Treatment  Yes  No
4. Final best treatment choice:  
 Flow diversion  
 Coiling  $\pm$  stenting  
 Parent vessel occlusion  $\pm$  bypass  
 Surgical clipping  
 Observation
5. Confidence level in your selection of final treatment choice:  
            
 0%    20%    40%    60%    80%    100%



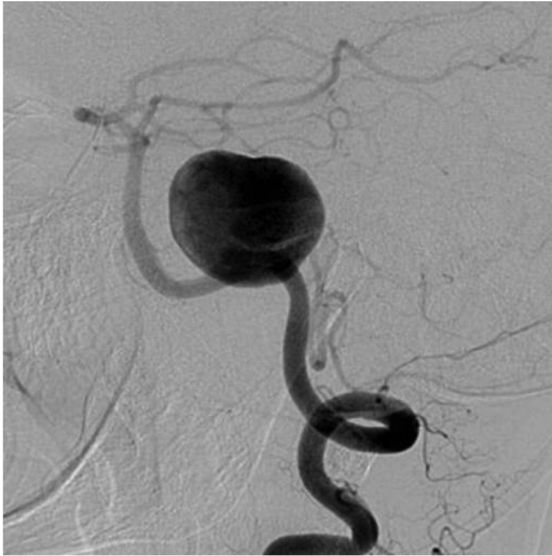

**Case 34**

72 F

46 mm vertebrobasilar junction aneurysm

Mass effect (mild)

Failed Test Balloon Occlusion

1. Is Flow diversion ( $\pm$  coils) an option for this patient ?

Yes  No

2. Any other option that you would conceivably offer this patient ? Choose one :

- No, only FD  $\pm$  coils
- Coiling  $\pm$  stenting
- Parent vessel occlusion  $\pm$  bypass
- Surgical clipping
- Observation

3. Would you be willing to recruit *this* patient in an RCT that would give a 50% chance of FD and a 50% chance of Best Standard Treatment  Yes  No

4. Final best treatment choice:

- Flow diversion
- Coiling  $\pm$  stenting
- Parent vessel occlusion  $\pm$  bypass
- Surgical clipping
- Observation

5. Confidence level in your selection of final treatment choice:

0% 20% 40% 60% 80% 100%

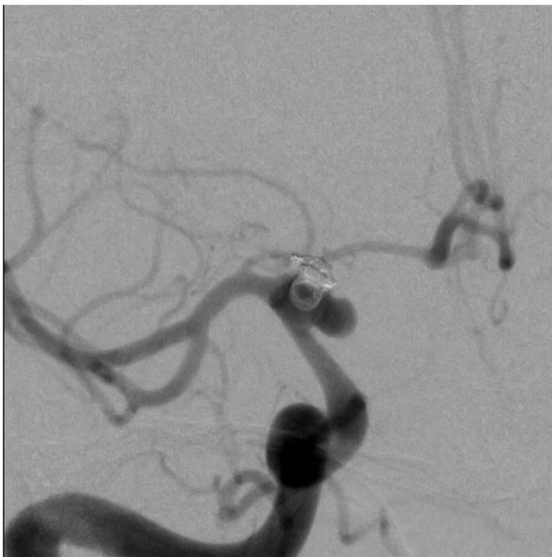

**Case 35**

42 M

Recurrent SAH from recently coiled supraclinoid 3 mm carotid blister aneurysm

Grade IV SAH

1. Is Flow diversion ( $\pm$  coils) an option for this patient ?

Yes  No

2. Any other option that you would conceivably offer this patient ? Choose one :

- No, only FD  $\pm$  coils
- Coiling  $\pm$  stenting
- Parent vessel occlusion  $\pm$  bypass
- Surgical clipping
- Observation

3. Would you be willing to recruit *this* patient in an RCT that would give a 50% chance of FD and a 50% chance of Best Standard Treatment  Yes  No

4. Final best treatment choice:

- Flow diversion
- Coiling  $\pm$  stenting
- Parent vessel occlusion  $\pm$  bypass
- Surgical clipping
- Observation

5. Confidence level in your selection of final treatment choice:

0% 20% 40% 60% 80% 100%
